# Supplementary material for: Comparing Discounting of Potentially Real Rewards and Losses by Means of Functional Magnetic Resonance Imaging
Source: Front Syst Neurosci. 2022 Jul 28;16:867202. doi: 10.3389/fnsys.2022.867202 (PMC9365957; doi:10.3389/fnsys.2022.867202)
Supplement: Supplementary file 2 [file Table_1.xlsx]

## Sheet: Tabelle1
Table S1. Statistically significant fMRI clusters for contrast during the decision phase. Table shows 3 local maxima more than 8 mm apart.
Reward Decision > Baseline (p < .05 FWE-corrected)
	Cluster			Peak
Name	p(FWE-corr)	k	p(unc)	p(FWE-corr)	T	p(unc)	MNI [x;y;z]
lingual G.	0	1111	1.04147e-40	2.42178e-05	9.811	1.06733e-10	[4;-88;-2]
				9.62667e-05	9.18656	4.24268e-10	[10;-82;0]
				0.000162485	8.95555	7.16107e-10	[-12;-76;12]
Cerebellum	1.11022e-16	249	1.76905e-15	0.000122283	9.08061	5.38927e-10	[20;-48;-26]
				0.000485678	8.48206	2.14049e-09	[20;-56;-28]
				0.000831823	8.25396	3.66602e-09	[8;-62;-26]
anterior Insula, Operculum	5.89861e-13	159	1.14995e-11	0.000166878	8.94387	7.35466e-10	[-30;22;-8]
				0.000868192	8.23595	3.8263e-09	[-36;14;-2]
				0.00183668	7.92333	8.09461e-09	[-36;24;2]
postcentral G., precentral G.	1.23235e-14	197	2.40251e-13	0.000179772	8.91129	7.92293e-10	[-44;-20;52]
				0.000361456	8.60855	1.59301e-09	[-42;-22;60]
				0.000621907	8.37689	2.74087e-09	[-34;-22;66]
superior parietal l.	9.96325e-12	133	1.94241e-10	0.0016396	7.97035	7.22604e-09	[42;-42;58]
				0.00880392	7.22733	4.49078e-08	[34;-48;54]
				0.0127168	7.05174	6.98532e-08	[34;-38;54]
SMC, ACC	9.95848e-11	113	1.94148e-09	0.00182621	7.92569	8.04849e-09	[0;20;52]
				0.00532881	7.46823	2.46468e-08	[0;28;46]
				0.00540816	7.46111	2.50848e-08	[8;22;30]
superior parietal l.	4.38558e-11	120	8.55e-10	0.0023525	7.82121	1.03679e-08	[-42;-44;60]
				0.010567	7.14009	5.5904e-08	[-32;-50;48]
				0.0190945	6.85818	1.14163e-07	[-40;-40;52]
Loss Decision > Baseline (p < .05 FWE-corrected)
lingual G.	0	1256	1.94208e-43	0.000231582	8.80091	1.02063e-09	[8;-84;-4]
				0.000232246	8.79967	1.02355e-09	[-6;-80;0]
				0.000477022	8.48974	2.10234e-09	[12;-90;14]
middle frontal G.	1.76518e-05	29	0.000344138	0.000418567	8.54562	1.84471e-09	[38;2;48]
SMC	1.8916e-06	42	3.68782e-05	0.00148074	8.01266	6.52591e-09	[0;16;60]
postcentral G.	1.16993e-06	45	2.28087e-05	0.00152875	7.9994	6.73752e-09	[-40;-20;52]
anterior Insula, Operculum	3.44688e-11	125	6.71994e-10	0.00155845	7.99141	6.86842e-09	[30;22;2]
				0.00463347	7.52647	2.13421e-08	[38;22;-6]
				0.0151075	6.9607	8.79618e-08	[46;20;-10]
anterior Insula, Operculum	8.54323e-07	47	1.66556e-05	0.00283253	7.74497	1.24836e-08	[-38;22;-6]
				0.0047468	7.51482	2.1965e-08	[-30;26;-2]
superior parietal l.	6.10623e-15	209	1.19768e-13	0.00487003	7.50247	2.26456e-08	[-38;-48;46]
				0.00584832	7.41437	2.81671e-08	[-42;-48;62]
				0.0067575	7.34499	3.34709e-08	[-46;-40;62]
superior parietal l.	8.54323e-07	47	1.66556e-05	0.00562602	7.433	2.68947e-08	[-40;-36;50]
supramarginal g.	0.000154887	18	0.00301988	0.00620958	7.38558	3.02557e-08	[52;-26;50]
supramarginal g.	0.000240052	16	0.00468054	0.00656241	7.35905	3.23198e-08	[40;-54;62]
superior parietal l.	3.83182e-12	145	7.47039e-11	0.00699319	7.32855	3.48708e-08	[40;-38;50]
				0.0141451	6.99204	8.12419e-08	[34;-50;46]
				0.0199264	6.82896	1.22995e-07	[40;-40;42]
middle occipital g.	0.00174606	8	0.0340705	0.00950897	7.18147	5.03823e-08	[-44;-72;10]
lingual G.	0.00232775	7	0.045434	0.0102842	7.14404	5.53522e-08	[18;-52;-2]
superior frontal G.	0.00232775	7	0.045434	0.0109199	7.11541	5.94887e-08	[-6;30;40]
inferior temporal G.	0.00314689	6	0.0614476	0.0128925	7.03622	7.26483e-08	[50;-56;-16]
Cerebellum	0.00132515	9	0.0258519	0.0142114	6.98982	8.17019e-08	[26;-64;-24]
lingual G.	0.00432794	5	0.0845594	0.0148151	6.97001	8.59093e-08	[-16;-44;0]
middle frontal G.	0.00314689	6	0.0614476	0.0197935	6.83214	1.22e-07	[40;36;24]
precentral G.	0.00174606	8	0.0340705	0.0243023	6.73453	1.56594e-07	[-50;8;36]
Thalamus	0.0133268	2	0.261562	0.0294236	6.64355	1.9781e-07	[10;-8;6]
middle frontal G.	0.00880941	3	0.172507	0.0329407	6.58978	2.27192e-07	[-44;28;26]
SMC	0.00608405	4	0.118975	0.0339618	6.57524	2.35877e-07	[-4;22;44]
superior parietal l.	0.0217961	1	0.42963	0.0366291	6.5392	2.58881e-07	[-30;-56;54]
Cerebellum	0.0133268	2	0.261562	0.0372086	6.53171	2.63938e-07	[18;-58;4]
lingual G.	0.0133268	2	0.261562	0.0396344	6.50158	2.8533e-07	[26;-46;-26]
SMC	0.0133268	2	0.261562	0.0408916	6.48667	2.96557e-07	[4;10;54]
superior frontal G.	0.0133268	2	0.261562	0.0410827	6.48445	2.98271e-07	[8;30;44]
lingual G.	0.0133268	2	0.261562	0.0414923	6.47971	3.01954e-07	[-18;-68;4]
middle frontal G.	0.0133268	2	0.261562	0.0417447	6.47681	3.04228e-07	[-42;20;38]
Cerebellum	0.0217961	1	0.42963	0.0444389	6.44693	3.28732e-07	[-20;-60;-28]
middle frontal G.	0.0217961	1	0.42963	0.0444413	6.4469	3.28754e-07	[44;22;44]
precentral G.	0.0217961	1	0.42963	0.0453401	6.43733	3.3702e-07	[-30;-22;68]
lingual G.	0.0217961	1	0.42963	0.0465588	6.42464	3.48301e-07	[8;-66;12]
anterior Insula	0.0217961	1	0.42963	0.0473412	6.41667	3.55587e-07	[34;22;-10]
Cerebellum	0.0217961	1	0.42963	0.0488245	6.4019	3.69493e-07	[14;-50;-20]
Loss Decision > Reward Decision (cluster-defining threshold p < .001, significance threshold p < .05)
///
Reward Decision > Loss Decision (cluster-defining threshold p < .001, significance threshold p < .05)
///
									///
