# Supplementary material for: Comparing Discounting of Potentially Real Rewards and Losses by Means of Functional Magnetic Resonance Imaging
Source: Front Syst Neurosci. 2022 Jul 28;16:867202. doi: 10.3389/fnsys.2022.867202 (PMC9365957; doi:10.3389/fnsys.2022.867202)
Supplement: Supplementary file 3 [file Table_2.xlsx]

## Sheet: Tabelle1
Table S2. Statistically significant fMRI clusters for contrasts during the anticipation phase. Table shows 3 local maxima more than 8 mm apart
Reward Anticipation > impl. Baseline (cluster-defining threshold p < .001, significance threshold p < .05)
	Cluster			Peak
Name	p(FWE-corr)	k	p(unc)	p(FWE-corr)	T	p(unc)	MNI [x;y;z]
Putamen, Pallidum, SMC, anterior Insula, ACC, Operculum	0	11793	1.57665e-58	2.22679e-05	9.84974	9.81395e-11	[36;18;8]
				6.6604e-05	9.35101	2.93538e-10	[-24;2;0]
				0.000119256	9.09168	5.25588e-10	[-4;0;64]
G. Precentralis	0.000175181	313	7.19285e-06	0.141423	5.93236	1.26447e-06	[48;-4;44]
				0.234258	5.67158	2.52392e-06	[32;-12;40]
Cerebellum	0.000146925	320	6.03258e-06	0.160349	5.86884	1.49562e-06	[10;-54;-12]
				0.874931	4.70174	3.39459e-05	[-6;-52;-10]
				0.881811	4.68876	3.51512e-05	[0;-50;-16]
White matter, parietal operculum	0.00176551	226	7.25487e-05	0.563462	5.14055	1.04397e-05	[-44;-36;30]
				0.941659	4.54983	5.10442e-05	[-38;-42;26]
				0.955816	4.5041	5.77059e-05	[-36;-38;14]
G. Precentralis, G. postcentralis	0.00054634	269	2.24366e-05	0.648354	5.03084	1.40168e-05	[18;-22;64]
				0.892427	4.66787	3.71798e-05	[26;-26;58]
				0.998515	4.13593	0.000154294	[14;-30;56]
White matter	0.000454126	276	1.86488e-05	0.913607	4.62234	4.20161e-05	[-26;-42;26]
				0.996575	4.20579	0.000128118	[-30;-50;20]
				0.99965	4.03274	0.000202896	[-28;-52;28]
White matter	0.0375284	126	0.00157042	0.982862	4.37312	8.19555e-05	[28;-44;22]
				0.98958	4.31557	9.55889e-05	[22;-30;34]
				0.999973	3.88672	0.000298337	[18;-44;24]
Loss Anticipation > Baseline (cluster-defining threshold p < .001, significance threshold p < .05)
SMC, Operculum, SFG, anterior Insula, G. Precentralis, Putamen, Pallidum	0	2198	3.31178e-19	0.00138495	8.04048	6.10376e-09	[-4;-6;66]
				0.00404038	7.59998	1.78068e-08	[-50;0;10]
				0.00682979	7.37667	3.09336e-08	[-44;6;4]
inferior occipital gyrus	5.12584e-06	476	2.1663e-07	0.00530704	7.4894	2.33893e-08	[-26;-96;-4]
G. precentralis, G. postcentralis, white matter	2.62967e-12	1290	1.11138e-13	0.0111909	7.14018	5.58919e-08	[-28;-42;22]
				0.0609931	6.3308	4.44563e-07	[-22;-24;56]
				0.1289	5.965	1.16008e-06	[-34;-46;26]
White matter	1.19963e-07	661	5.06991e-09	0.0609108	6.33145	4.43811e-07	[28;-48;24]
				0.0827107	6.18341	6.53355e-07	[24;-38;30]
				0.891794	4.6549	3.84985e-05	[22;-36;44]
Putamen, Pallidum, Operculum, anterior Insula	2.28175e-08	749	9.64319e-10	0.0752561	6.22928	5.79442e-07	[20;6;-2]
				0.878186	4.68142	3.58507e-05	[38;10;12]
				0.961734	4.4675	6.36543e-05	[22;16;22]
G. precentralis, G. postcentralis	3.56469e-06	493	1.50652e-07	0.101402	6.08379	8.48496e-07	[20;-26;64]
				0.348501	5.43672	4.72135e-06	[48;-4;44]
				0.630648	5.03969	1.36875e-05	[34;-14;46]
Inferior occipital gyrus	0.000330176	296	1.39563e-05	0.111768	6.03582	9.62584e-07	[20;-96;-2]
				0.11988	6.00112	1.05472e-06	[30;-94;-2]
White matter	0.00592361	189	0.000251089	0.142166	5.91592	1.32058e-06	[26;36;6]
				0.423876	3.63626	0.000138311	[22;30;16]
Reward Anticipation > Loss Anticipation (cluster-defining threshold p < .001, significance threshold p < .05)
middle frontal G., precentral G., frontal inferior G., Putamen, anterior Insula, Operculum	0	2786	4.17333e-26	0.00316129	7.70002	1.39325e-08	[34;8;28]
	[]	[]	[]	0.0141371	7.09705	6.23052e-08	[44;12;24]
	[]	[]	[]	0.100343	6.1972	6.30178e-07	[34;22;30]
G. frontalis medius G. precentralis, G. frontalis inferior, Putamen, anterior Insula, Operculum	2.10942e-15	1413	7.23165e-17	0.0362156	6.68971	1.75678e-07	[-44;4;28]
	[]	[]	[]	0.108701	6.15777	6.98749e-07	[-32;16;-4]
	[]	[]	[]	0.145362	6.01281	1.02271e-06	[-34;6;28]
G. occipitalis, G. lingualis	0	2128	6.21023e-22	0.20078	5.84727	1.58348e-06	[32;-66;-6]
	[]		[]	0.289798	5.64998	2.67321e-06	[0;-82;-2]
	[]		[]	0.297273	5.63577	2.77623e-06	[-8;-80;-10]
Superior parietal lobule	7.28752e-11	862	2.45442e-12	0.23199	5.77105	1.93791e-06	[32;-52;48]
	[]	[]	[]	0.792594	4.93212	1.82755e-05	[32;-46;42]
	[]	[]	[]	0.827229	4.87963	2.10448e-05	[28;-68;40]
ACC, superior frontal G., SMC	0.000720938	216	2.42898e-05	0.258303	5.71322	2.25947e-06	[12;26;26]
	[]	[]	[]	0.97297	4.53075	5.37248e-05	[16;20;40]
	[]	[]	[]	0.997192	4.28935	0.000102522	[-4;26;46]
Superior parietal lobule	9.40592e-05	281	3.16805e-06	0.322931	5.58898	3.14467e-06	[-28;-68;28]
	[]	[]	[]	0.999411	4.17022	0.000140846	[-24;-60;40]
postcentral G., precentral G.	0.0190984	124	0.000649453	0.876298	4.79609	2.63428e-05	[-44;-22;52]
	[]	[]	[]	0.999352	4.17674	0.000138424	[-34;-22;62]
Superior parietal lobule	0.0261843	116	0.000893635	0.952365	4.61415	4.295e-05	[-38;-46;52]
	[]	[]	[]	0.999998	3.87627	0.000306656	[-28;-48;40]
	[]	[]	[]	1	3.66986	0.00052621	[-36;-42;42]
Reward Anticipation > Loss Anticipation (cluster-defining threshold p < .001, significance threshold p < .05)
Ventral striatum, subcallosal G.	0.000366041	237	1.23305e-05	0.437976	5.4064	5.1201e-06	[-10;18;-10]
	[]	[]	[]	0.659185	5.1123	1.12623e-05	[4;16;-8]
	[]	[]	[]	0.867233	4.81264	2.51971e-05	[10;20;-12]
Ventral striatum, subcallosal G.	0.0115769	137	0.000392184	0.660944	5.11003	1.13311e-05	[4;16;-24]
	[]	[]	[]	0.700601	5.05848	1.30137e-05	[4;24;-26]
	[]	[]	[]	0.995673	4.32764	9.25538e-05	[-2;10;-24]
Reward Anticipation * Subjective Value (cluster-defining threshold p < .001, significance threshold p < .05)
Putamen, Caudate, anterior Insula	0.000406593	282	1.68107e-05	0.0366929	6.58489	2.30077e-07	[34;14;-4]
	[]	[]	[]	0.326089	5.48574	4.14179e-06	[32;18;-14]
	[]	[]	[]	0.64927	5.02635	1.4187e-05	[26;20;4]
Cerebellum	1.72323e-05	412	7.12338e-07	0.0654718	6.30722	4.72749e-07	[2;-60;-26]
	[]	[]	[]	0.476104	5.25439	7.69238e-06	[-4;-54;-34]
	[]	[]	[]	0.563142	5.13767	1.05207e-05	[4;-58;-36]
ACC	0.0170476	151	0.000710773	0.622275	5.06115	1.29208e-05	[8;40;20]
	[]	[]	[]	0.829447	4.7763	2.77822e-05	[12;38;8]
	[]	[]	[]	1	3.67393	0.000520666	[12;36;0]
Loss Anticipation * Subjective Value (cluster-defining threshold p < .001, significance threshold p < .05)
middle frontal G., superior frontal G.	0.00109948	234	4.33033e-05	0.12641	6.00859	1.03416e-06	[30;22;30]
	[]	[]	[]	0.725072	4.95067	1.73863e-05	[36;24;24]
	[]	[]	[]	0.901335	4.67013	3.69544e-05	[24;26;34]
middle cingulate G.	0.0130296	153	0.000516264	0.150831	5.91991	1.30671e-06	[2;-6;30]
	[]	[]	[]	0.995745	4.24696	0.0001148	[-4;8;28]
Thalamus	0.0207465	139	0.000825246	0.893957	4.68545	3.54645e-05	[-12;-22;14]
	[]	[]	[]	0.9883	4.34966	8.7263e-05	[-8;-16;10]
Precuneus	0.0143796	150	0.000570141	0.979907	4.41406	7.34511e-05	[16;-52;14]
	[]	[]	[]	0.998915	4.13362	0.000155247	[6;-58;18]
	[]	[]	[]	0.999072	4.12204	0.000160097	[22;-64;16]
Thalamus	0.0254267	133	0.00101383	0.986675	4.36444	8.38809e-05	[18;-22;8]
	[]	[]	[]	0.993497	4.28763	0.000102994	[8;-24;12]
	[]	[]	[]	0.999995	3.82748	0.00034859	[12;-12;6]
Reward Anticipation: ROI in Ventral Striatum (small volume corrected significance threshold p < .05)
Ventral Striatum	0.0202897	19	0.160552	0.00471113	4.97222	1.64082e-05	[10;6;0]
				0.0176165	4.37067	8.24942e-05	[12;6;-4]
				0.072395	3.68679	0.000503536	[16;12;-4]
