# Supplementary material for: Comparing Discounting of Potentially Real Rewards and Losses by Means of Functional Magnetic Resonance Imaging
Source: Front Syst Neurosci. 2022 Jul 28;16:867202. doi: 10.3389/fnsys.2022.867202 (PMC9365957; doi:10.3389/fnsys.2022.867202)
Supplement: Supplementary file 4 [file Table_3.xlsx]

## Sheet: Tabelle1
Table S3. Statistically significant fMRI clusters for the combined contrast of Reward and Loss during the decision phase. Table shows 3 local maxima more than 8 mm apart
Reward + Loss Decision > Baseline (p < .05 FWE-corrected)
	Cluster			Peak			MNI
Name	p(FWE-corr)	k	p(unc)	p(FWE-corr)	T	p(unc)	x	y	z
lingual G.	0	3340	1.61607e-76	4.72554e-06	10.5815	2.08267e-11	8	-86	-4
				2.17997e-05	9.85956	9.60759e-11	-6	-70	14
				2.7108e-05	9.75912	1.19471e-10	20	-52	-28
postcentral G., precentral G.	0	1161	3.39234e-38	7.867e-06	10.3374	3.46717e-11	-40	-20	52
				0.000103677	9.15365	4.56926e-10	-44	-42	62
				0.000156992	8.97064	6.91898e-10	-34	-22	66
middle frontal G.	3.03727e-06	44	5.92138e-05	4.83061e-05	9.49571	2.12895e-10	38	2	50
ant. Insula	0	317	1.69859e-16	5.93807e-05	9.40258	2.61703e-10	-34	24	-2
				0.000448098	8.51646	1.97486e-09	-50	18	0
				0.00263768	7.7534	1.22293e-08	-34	14	0
ant. Insula	0	327	7.94619e-17	6.26081e-05	9.37879	2.75927e-10	30	20	6
				0.0035084	7.61515	1.71549e-08	38	20	-4
				0.00392069	7.56148	1.95766e-08	32	20	-12
sup. Frontal G.	0	845	4.81328e-31	0.000252255	8.76381	1.11174e-09	42	-38	52
				0.000260413	8.75001	1.14769e-09	40	-46	56
				0.000333994	8.64254	1.47198e-09	44	-40	60
SMC, ACC	0	563	7.4559e-24	0.000595696	8.39516	2.62536e-09	4	24	48
				0.00131686	8.06148	5.80368e-09	2	16	60
				0.00339377	7.63122	1.64913e-08	-4	34	46
inferior temp. G.	8.78371e-06	37	0.000171245	0.00105142	8.15555	4.63383e-09	50	-58	-16
				0.024693	6.68264	1.78896e-07	42	-60	-16
Ventral diencephalon	2.72339e-05	30	0.000530952	0.00113308	8.12424	4.99372e-09	6	-28	-14
				0.00487099	7.45692	2.53469e-08	-2	-28	-16
inf. Occipital G.	1.42102e-08	85	2.77038e-07	0.00124138	8.0861	5.471e-09	-46	-72	-10
				0.00982771	7.12082	5.86827e-08	-44	-60	-4
middle occipital G.	1.27762e-06	50	2.49082e-05	0.0013978	8.03664	6.16038e-09	-48	-72	12
Thalamus	1.91802e-07	64	3.73932e-06	0.00282735	7.71969	1.32785e-08	-12	-16	4
				0.0182267	6.82689	1.23647e-07	-20	-18	8
temporal pole	7.312e-07	54	1.42553e-05	0.00298511	7.69335	1.41618e-08	46	18	-14
				0.00673355	7.30151	3.73041e-08	42	10	-22
precentral G.	2.49182e-07	62	4.85799e-06	0.00302201	7.6874	1.43697e-08	-54	4	20
				0.00771758	7.23624	4.39168e-08	-50	10	34
middle frontal G.	3.9665e-09	96	7.73298e-08	0.00389908	7.56415	1.94484e-08	48	24	30
				0.00716101	7.27204	4.01536e-08	50	12	36
ACC	0.000111386	22	0.00217167	0.00437445	7.50868	2.23007e-08	10	22	26
Cerebellum	6.44388e-06	39	0.000125628	0.00458961	7.48555	2.36126e-08	-26	-52	-26
precentral G.	0.00174601	9	0.0340694	0.00534766	7.41204	2.83307e-08	-32	-12	68
middle frontal G.	6.3737e-07	55	1.2426e-05	0.00553547	7.39546	2.95215e-08	-48	34	22
middle frontal G.	2.72339e-05	30	0.000530952	0.0056542	7.38527	3.02786e-08	-32	2	50
				0.00784797	7.22823	4.48068e-08	-28	0	58
middle frontal G.	1.20408e-05	35	0.000234746	0.00619654	7.34133	3.37773e-08	-40	44	-2
				0.0120365	7.02422	7.48869e-08	-36	42	6
precentral G.	0.000162471	20	0.00316774	0.00680457	7.29649	3.7775e-08	-22	-14	72
				0.0142556	6.9437	9.18403e-08	-20	-6	70
superior frontal lobe	0.000111386	22	0.00217167	0.00701009	7.28224	3.91434e-08	-32	-48	70
precentral G.	0.00521312	5	0.101899	0.00710641	7.27571	3.97876e-08	-54	-2	34
inferior frontal G.	0.000683202	13	0.0133241	0.00761455	7.24267	4.32158e-08	-46	-52	-20
middle frontal G.	6.45541e-05	25	0.00125857	0.00802696	7.21745	4.60336e-08	48	46	-4
middle frontal G.	0.000111386	22	0.00217167	0.00824252	7.20479	4.75187e-08	40	36	22
Cerebellum	0.00174601	9	0.0340694	0.00874038	7.17678	5.09798e-08	34	-58	-32
SMC	0.000549033	14	0.0107067	0.00908052	7.15855	5.33687e-08	-2	-12	56
Middle cingulate	0.0147365	2	0.289436	0.00908765	7.15818	5.3419e-08	-6	6	28
Cerebellum	0.00035991	16	0.00701797	0.0106038	7.08458	6.42951e-08	-10	-66	-24
middle temporal G.	0.000293344	17	0.00571979	0.0110171	7.06637	6.73202e-08	44	-64	12
lingual G.	0.00136564	10	0.0266423	0.0125136	7.00571	7.84775e-08	22	-42	-6
Thalamus	0.000162471	20	0.00316774	0.0128423	6.99337	8.0969e-08	10	-8	6
inferior frontal G.	0.00024004	18	0.00468031	0.0129505	6.98938	8.17929e-08	46	-70	-4
middle frontal G.	0.0038833	6	0.0758551	0.013192	6.98058	8.36359e-08	-42	18	40
precentral G.	0.00714124	4	0.139723	0.0132558	6.97829	8.41239e-08	-4	-26	48
middle frontal G.	0.00293889	7	0.0573802	0.0133608	6.97454	8.4928e-08	42	24	44
Cerebellum	0.000854991	12	0.0166758	0.013465	6.97084	8.57278e-08	6	-66	-34
precentral G.	0.000111386	22	0.00217167	0.0152043	6.91306	9.9275e-08	38	-2	58
				0.0204675	6.7718	1.4234e-07	32	2	66
	0.00174601	9	0.0340694	0.0164356	6.87605	1.09082e-07	-4	-22	34
	0.00714124	4	0.139723	0.0173829	6.84942	1.16742e-07	32	-24	-16
	0.0100532	3	0.196986	0.0175904	6.84378	1.18433e-07	-50	-6	44
	0.000293344	17	0.00571979	0.0184328	6.82155	1.25345e-07	32	-74	-20
	0.00136564	10	0.0266423	0.0186411	6.81621	1.27066e-07	-30	-40	44
	0.0100532	3	0.196986	0.0195157	6.79443	1.34338e-07	-4	-4	32
	0.00225304	8	0.0439742	0.0210317	6.75888	1.47125e-07	-16	-46	0
	0.0147365	2	0.289436	0.021085	6.75768	1.47578e-07	6	-2	32
	0.00293889	7	0.0573802	0.0221314	6.73467	1.56538e-07	-12	-84	26
	0.00174601	9	0.0340694	0.0233342	6.70953	1.66962e-07	2	-34	-28
	0.023215	1	0.45793	0.0255561	6.66632	1.8656e-07	16	62	16
	0.0100532	3	0.196986	0.0264936	6.64919	1.94957e-07	52	2	32
	0.00293889	7	0.0573802	0.0273736	6.63366	2.02905e-07	30	-34	42
	0.00521312	5	0.101899	0.0287009	6.61116	2.15014e-07	-34	-18	0
	0.00521312	5	0.101899	0.0289663	6.60678	2.17452e-07	-32	-2	-4
	0.023215	1	0.45793	0.0295672	6.59702	2.22993e-07	30	-10	64
	0.0147365	2	0.289436	0.0297683	6.59379	2.24854e-07	34	-4	-12
	0.0147365	2	0.289436	0.031941	6.56029	2.45158e-07	2	26	58
	0.0100532	3	0.196986	0.0321804	6.55673	2.47416e-07	-38	-32	68
	0.00714124	4	0.139723	0.0322146	6.55623	2.4774e-07	36	42	20
	0.023215	1	0.45793	0.0336676	6.53523	2.61548e-07	38	26	30
	0.023215	1	0.45793	0.0359187	6.50442	2.83244e-07	40	48	-14
	0.023215	1	0.45793	0.0365124	6.49661	2.89026e-07	-6	-90	24
	0.0100532	3	0.196986	0.0365494	6.49612	2.89387e-07	-10	10	8
	0.023215	1	0.45793	0.037173	6.48806	2.95489e-07	22	-54	-52
	0.023215	1	0.45793	0.0372845	6.48664	2.96583e-07	14	-86	36
	0.023215	1	0.45793	0.0376349	6.48218	3.00027e-07	-18	-60	2
	0.0100532	3	0.196986	0.0383167	6.47362	3.06751e-07	-20	58	20
	0.0147365	2	0.289436	0.038534	6.47093	3.08901e-07	28	56	24
	0.023215	1	0.45793	0.0403262	6.44925	3.26755e-07	14	2	2
	0.023215	1	0.45793	0.041436	6.4363	3.37918e-07	-58	-22	24
	0.023215	1	0.45793	0.0423126	6.42631	3.46794e-07	-12	-94	22
	0.023215	1	0.45793	0.0425777	6.42333	3.49487e-07	-22	-54	-12
	0.023215	1	0.45793	0.043116	6.41733	3.54973e-07	-10	-24	-34
	0.023215	1	0.45793	0.0432426	6.41593	3.56265e-07	-10	20	26
	0.023215	1	0.45793	0.0441249	6.40629	3.65303e-07	-22	20	-8
	0.023215	1	0.45793	0.0445185	6.40205	3.6935e-07	-40	12	34
	0.0147365	2	0.289436	0.0445251	6.40198	3.69417e-07	-32	-26	4
	0.023215	1	0.45793	0.0446728	6.40039	3.7094e-07	-32	-18	-6
	0.023215	1	0.45793	0.0450609	6.39626	3.74944e-07	56	-58	2
	0.023215	1	0.45793	0.0454223	6.39244	3.78682e-07	20	-56	-50
	0.023215	1	0.45793	0.046497	6.38127	3.89845e-07	-28	6	-8
	0.023215	1	0.45793	0.0468288	6.37787	3.93306e-07	10	-4	0
	0.023215	1	0.45793	0.0468885	6.37726	3.93931e-07	-42	-2	42
	0.023215	1	0.45793	0.0477196	6.36886	4.02633e-07	44	46	-14
	0.023215	1	0.45793	0.0478948	6.3671	4.04473e-07	20	46	42
	0.023215	1	0.45793	0.048049	6.36557	4.06094e-07	-18	-50	-4
	0.023215	1	0.45793	0.0488022	6.35813	4.14034e-07	36	-64	-16
	0.023215	1	0.45793	0.0490652	6.35555	4.16814e-07	48	-60	44
	0.023215	1	0.45793	0.0491381	6.35484	4.17585e-07	-28	14	10
	0.023215	1	0.45793	0.0499318	6.34718	4.26006e-07	26	50	4
